# Supplementary material for: Identification and validation of novel prognostic signatures based on m5C methylation patterns and tumor EMT profiles in head and neck squamous cell carcinoma
Source: PubMed Central journal article supplement (PMC10618291; doi:10.1038/s41598-023-45976-6), 2023-10-31

## Supplementary Information

### Identification and Validation of Novel Prognostic Signatures Based on m5C Methylation Patterns and Tumor EMT Profiles in Head and Neck Squamous Cell Carcinoma

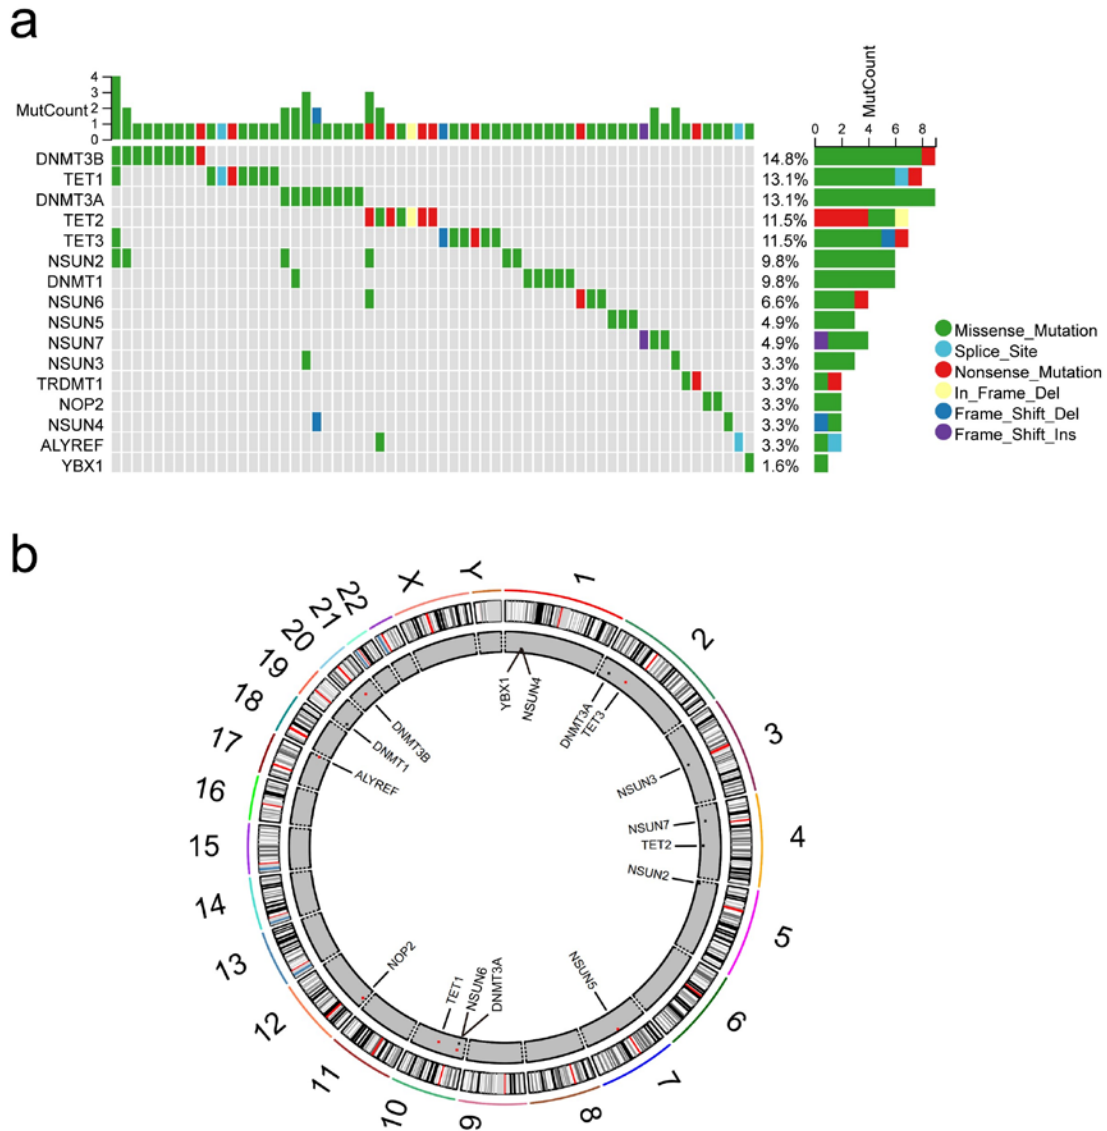

**Supplementary Figure 1.** Mutation mapping of m5C regulatory genes in HNSCC cohort. **a:** Mutational status of the m5C regulatory genes; **b:** CNV profile of the m5C regulatory genes on chromosomes

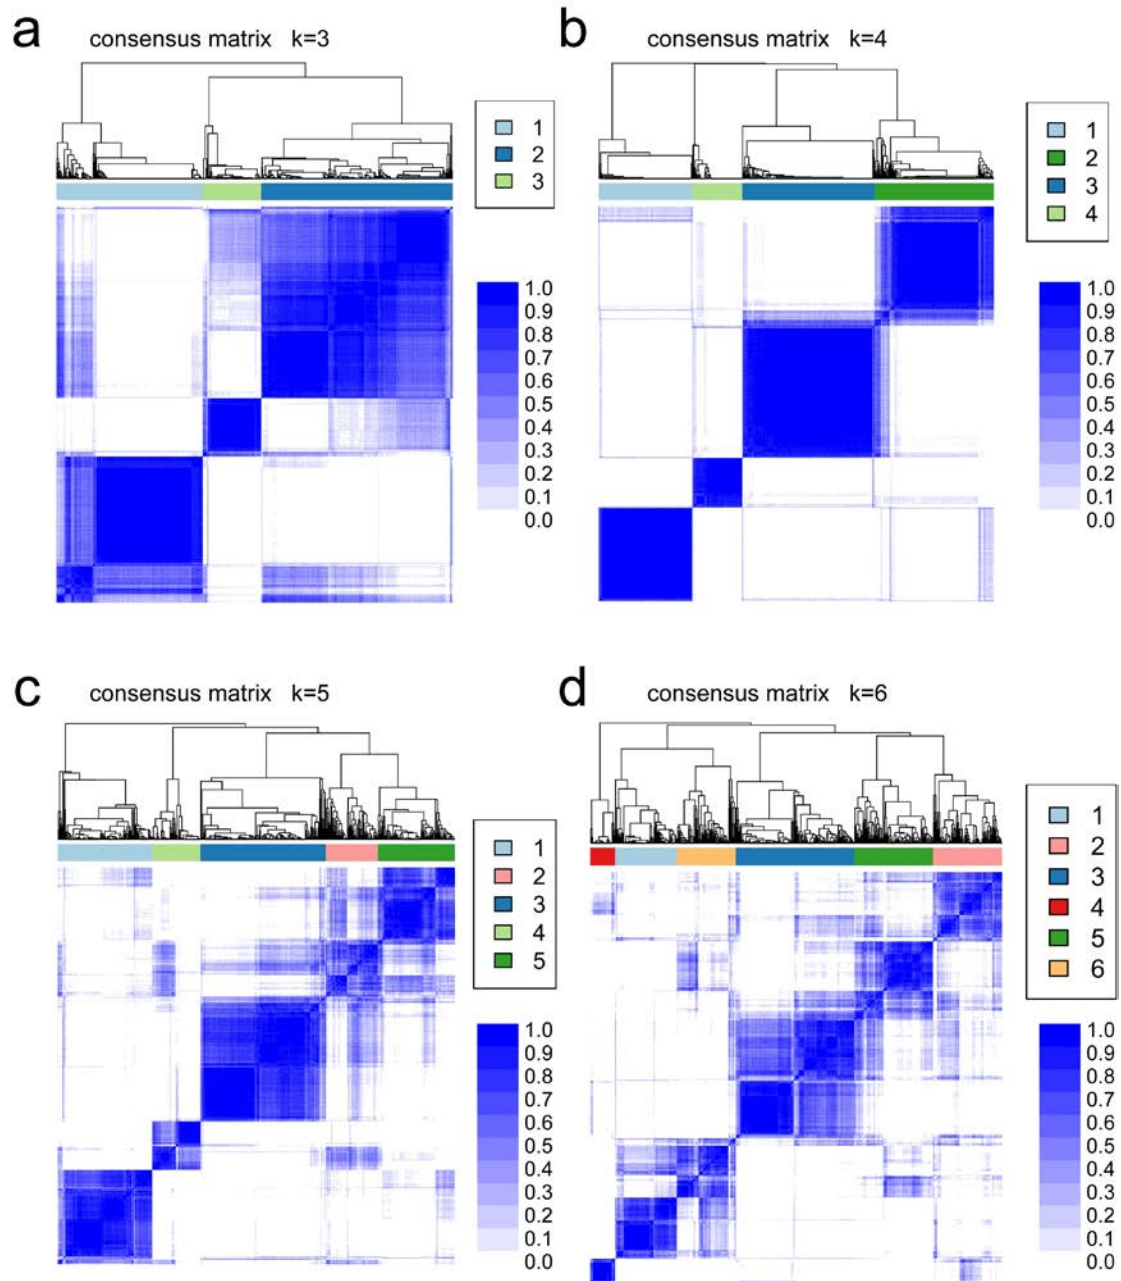

**Supplementary Figure 2.** Consensus clustering matrix for  $k = 3, 4, 5, 6$ .

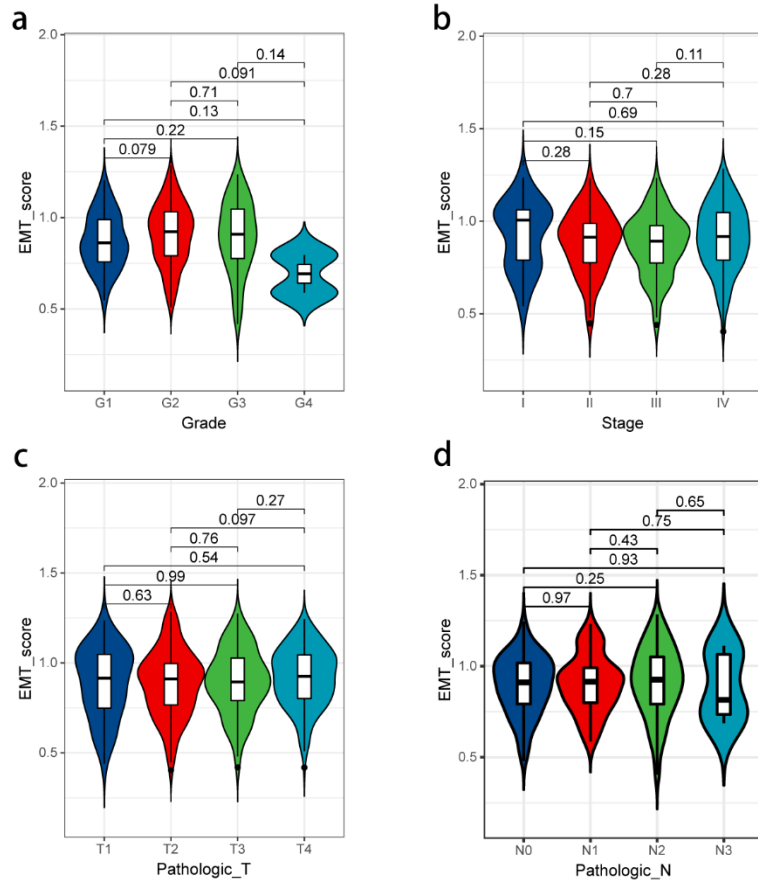

**Supplementary Figure 3.** EMT score of different grades, stages, T stages, and N stages.

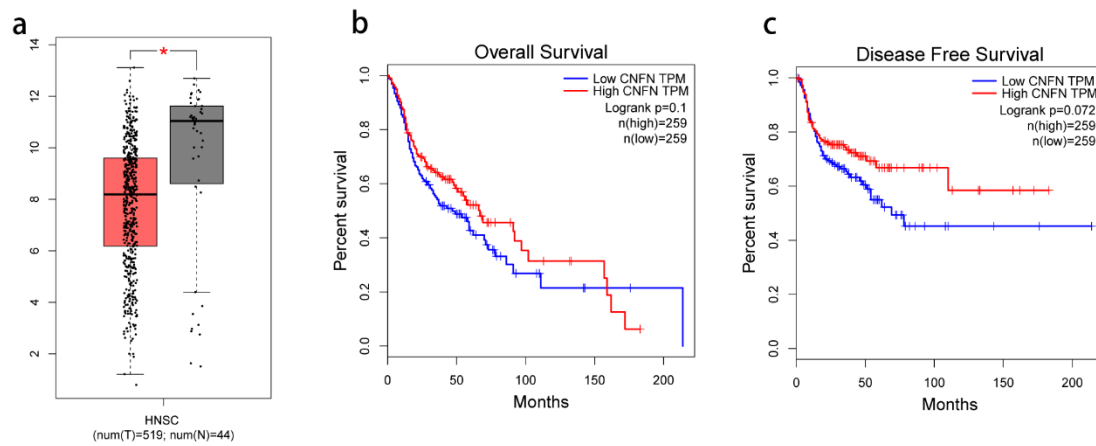

**Supplementary Figure 4. expression levels of CNFN in HNSCC.** a. expression levels of CNFN in normal tissues compared with HNSCC tissues; b and c. OS and DFS of different CNFN expression levels.

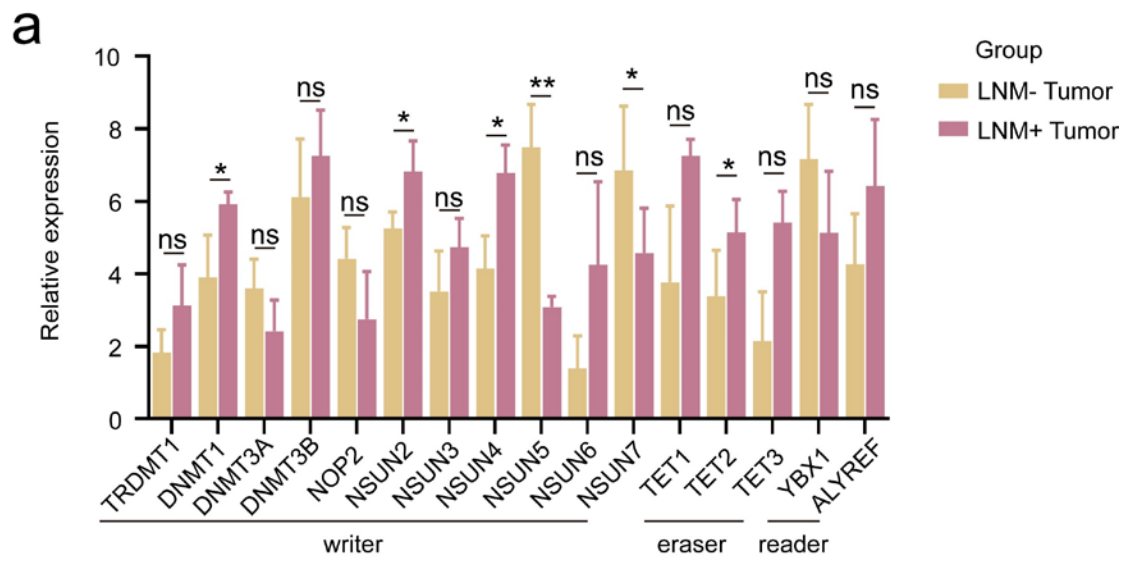

**Supplementary Figure 5.** Expression levels of 16 m5C regulators in clinical samples about LNM+ vs LNM-.

## Uncropped western blots

ZO-1

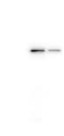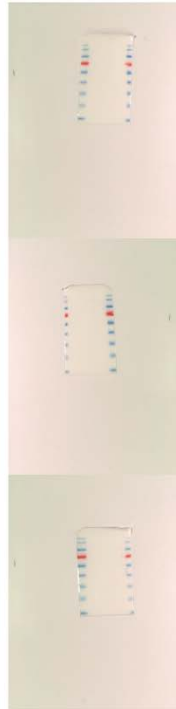

SLUG

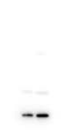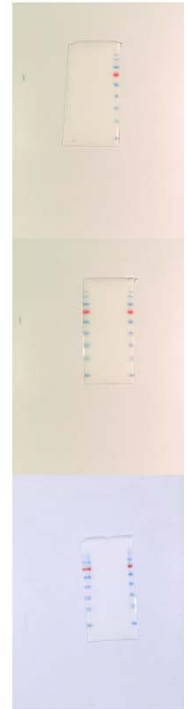

E-Cadherin

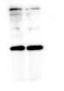

Vimentin

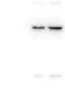

N-Cadherin

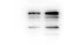

GAPDH

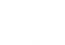

Supplement: 41598_2023_45976_MOESM4_ESM.pdf [file 41598_2023_45976_MOESM4_ESM.pdf]
